# Supplementary material for: Anisotropic properties of Ba1−xSrxFe12O19 single crystals
Source: Royal Society of Chemistry journal article supplement (doi:10.1039/d2ce00165a), 2022-01-01
Supplement: d2ce00165a1.pdf [file d2ce00165a1.pdf]

## Supplement

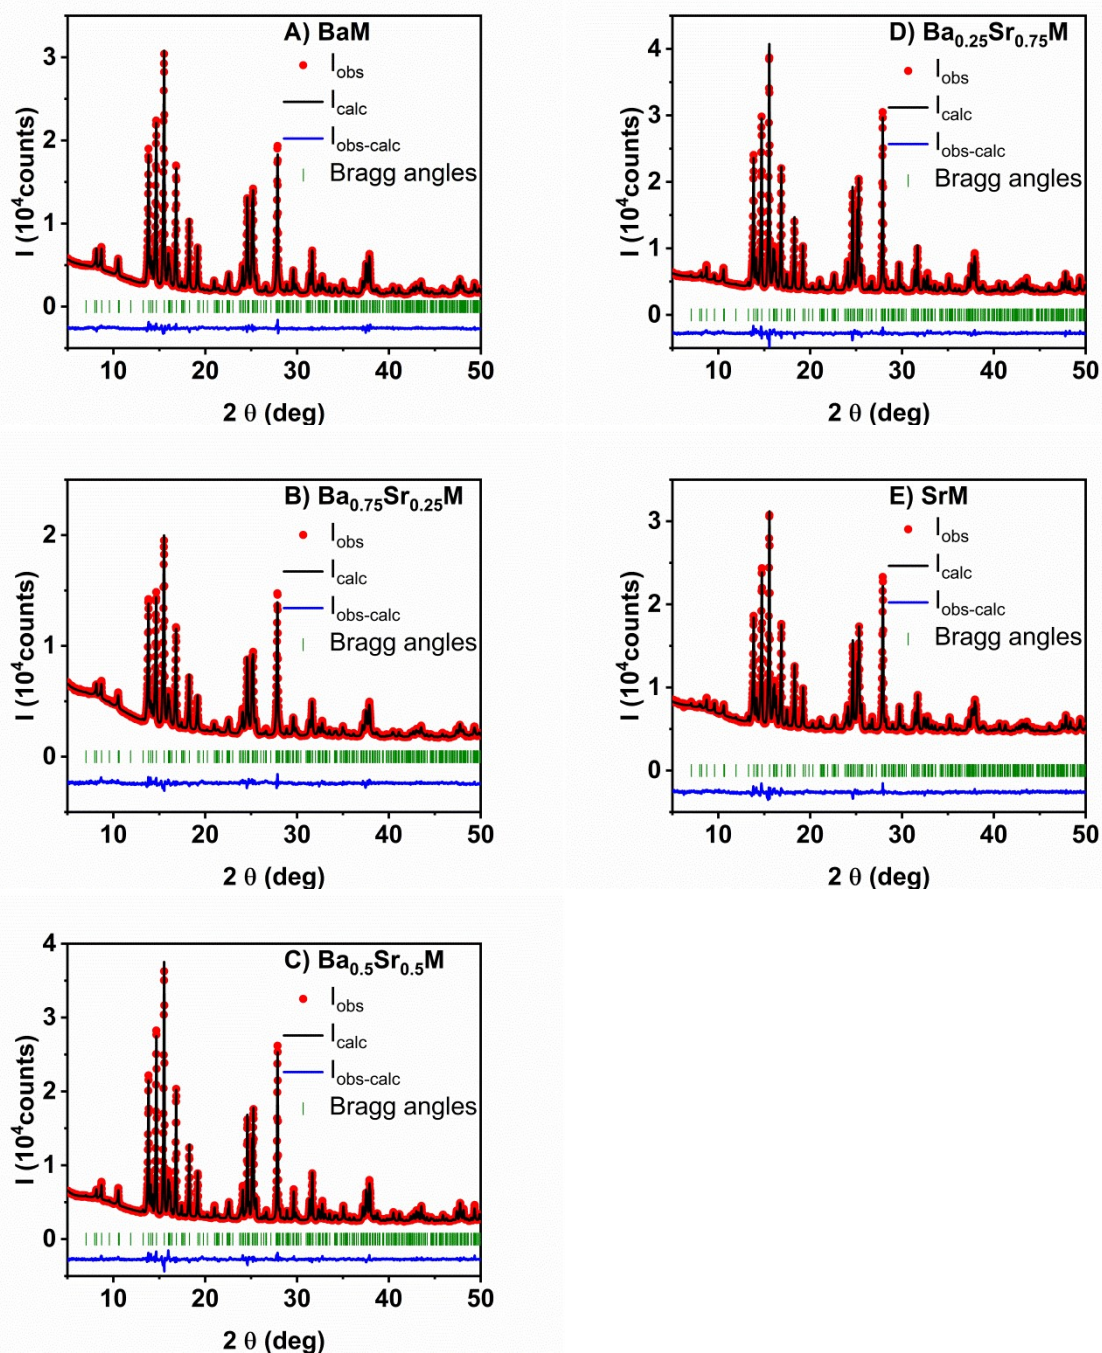

Figure (A) – (E) XRD patterns and Rietveld refinements for  $\text{Ba}_{1-x}\text{Sr}_x\text{Fe}_{12}\text{O}_{19}$  with  $x = 0, 0.25, 0.5, 0.75, 1$

Table I: XRD and XRF results

| x    | a/Å    | c/Å     | V/Å <sup>3</sup> | $\rho/g\text{-cm}^{-3}$ | wR/% | GOF  | x (RV)* | x (SC)* | x(XRF)* | $\sigma(x)$ ** |
|------|--------|---------|------------------|-------------------------|------|------|---------|---------|---------|----------------|
| 0    | 5.8847 | 23.1618 | 694.63           | 5.31                    | 2.84 | 1.57 | 0       | 0       | 0       | 0              |
| 0.25 | 5.8846 | 23.1466 | 694.15           | 5.25                    | 2.68 | 1.51 | 0.29    | 0.17    | 0.16    | 0.07           |
| 0.5  | 5.8842 | 23.1196 | 693.23           | 5.22                    | 2.68 | 1.70 | 0.45    | 0.4     | 0.39    | 0.09           |
| 0.75 | 5.8810 | 23.0730 | 691.09           | 5.16                    | 2.44 | 1.72 | 0.77    | 0.65    | 0.65    | 0.08           |
| 1    | 5.8769 | 23.0180 | 688.49           | 5.12                    | 1.81 | 1.42 | 1       | 1       | 0.99    | 0              |

\* Ba/Sr-ratio from Rietveld refinements (RV), single crystal data (SC) and X-ray fluorescence data (XRF)

\*\*  $\sigma(x)$  is the standard deviation calculated from the x values of the three methods compared to nominal x

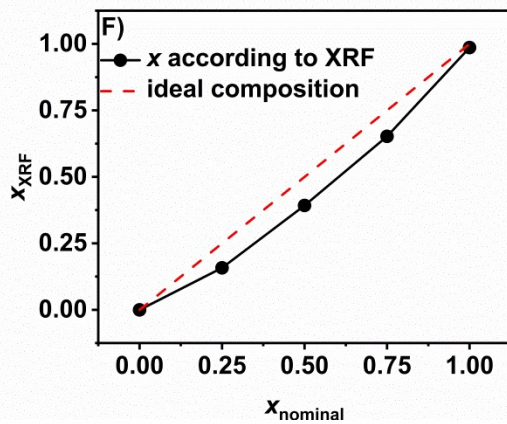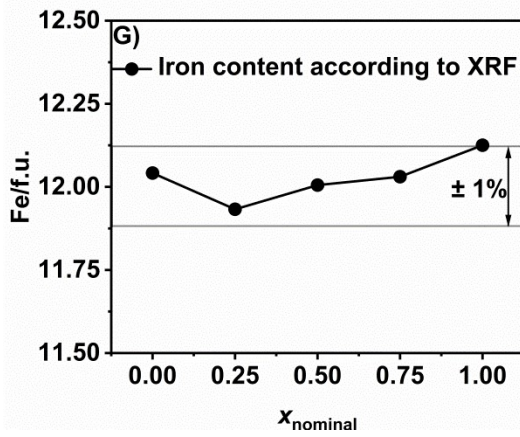

Figure (F) Sr-content per formula unit and number of  $\text{Fe}^{3+}$  per formula unit (G) determined by X-ray fluorescence spectroscopy

The Ba/Sr-stoichiometry and iron content were additionally checked via X-ray fluorescence analysis. Figure (F) and (G) show that  $x$  and the number of ferric ions per formula unit are in good accordance with the expected stoichiometry.

Figure (H) shows the hysteresis of the SrM single crystal at 5 K measured with  $B \parallel \langle 100 \rangle$ . The negligibly low values of remanence and coercivity in combination with the linear increase of  $\mu$  with  $B$  up to saturation indicate reversible soft magnetization behaviour. For this reason, additional contributions arising from domain-domain interactions, preferred domain growth directions and other phenomena can be neglected and one

can assume that the energy of the external field is solely used to align the magnetic moment of the sample either by rotation of a single magnetic crystal moment  $\mu_S$  or via a shifting of domain walls through the crystal without any perceptible resistance. The work required for aligning a magnetic moment parallel to an external field is  $W = \vec{m} \cdot \vec{B}$ . As the remanence is close to zero and  $\mu$  increases linearly with  $B$ , a good approximation for  $W$  is to use half of the area of the rectangle given

by  $\mu_S$  and  $B_S$ , i.e.  $W = \frac{1}{2} \mu_S \cdot B_S$  as shown in the right upper quadrant of Figure (H). The value of  $B_S$  can be derived from the intersection of the two tangents of the  $\mu \propto B$  and the  $\mu = \text{const.}$  regions as shown in the figure. In addition, the magnetization energies were also calculated by a 'pseudo-Lebesgue integration', i.e. a numerical integration as shown in the lower left quadrant of Figure (H). We found that the energies calculated by the two approaches differ by only a few percent. Nevertheless, the more precise values from the pseudo-

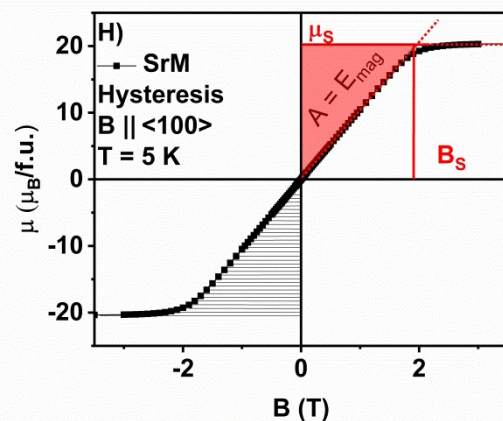

Figure (H) Principle of calculating the magnetization energies from a hysteresis graph

Lebesgue integration were used in the discussion.

Table II: Results of single crystal structure refinements

|              | Wyckoff                | $x/a$               | $y/b$               | $z/c$               | SOF*                 |                     |
|--------------|------------------------|---------------------|---------------------|---------------------|----------------------|---------------------|
| <b>Ba/Sr</b> | 2 <i>d</i>             | 2/3                 | 1/3                 | 1/4                 | $\Sigma_{Ba+Sr} = 1$ |                     |
| <b>Fe1</b>   | 2 <i>a</i>             | 0                   | 0                   | 0                   | 1                    |                     |
| <b>Fe2</b>   | 4 <i>e</i>             | 0                   | 0                   | <i>z</i>            | 1/2                  |                     |
| <b>Fe3</b>   | 4 <i>f</i>             | 1/3                 | 2/3                 | <i>z</i>            | 1                    |                     |
| <b>Fe4</b>   | 4 <i>f</i>             | 1/3                 | 2/3                 | <i>z</i>            | 1                    |                     |
| <b>Fe5</b>   | 12 <i>k</i>            | <i>x</i>            | 2 <i>x</i>          | <i>z</i>            | 1                    |                     |
| <b>O1</b>    | 4 <i>e</i>             | 0                   | 0                   | <i>z</i>            | 1                    |                     |
| <b>O2</b>    | 4 <i>f</i>             | 1/3                 | 2/3                 | <i>z</i>            | 1                    |                     |
| <b>O3</b>    | 6 <i>h</i>             | <i>x</i>            | 2 <i>x</i>          | 1/4                 | 1                    |                     |
| <b>O4</b>    | 12 <i>k</i>            | <i>x</i>            | 2 <i>x</i>          | <i>z</i>            | 1                    |                     |
| <b>O5</b>    | 12 <i>k</i>            | <i>x</i>            | 2 <i>x</i>          | <i>z</i>            | 1                    |                     |
|              |                        |                     |                     |                     |                      |                     |
|              | <b>x (Sr/f.u.)</b>     | <b>0</b>            | <b>0.25</b>         | <b>0.5</b>          | <b>0.75</b>          | <b>1</b>            |
| <b>Ba/Sr</b> | SOF* (Sr)              | 0                   | 0.17                | 0.4                 | 0.65                 | 1                   |
|              | $U_{iso}/\text{\AA}^2$ | 0.0045(2)           | 0.00361(19)         | 0.00642(18)         | 0.0068(2)            | 0.0086(3)           |
| <b>Fe1</b>   | $U_{iso}/\text{\AA}^2$ | 0.0027(3)           | 0.0016(3)           | 0.0038(2)           | 0.0025(2)            | 0.0018(3)           |
| <b>Fe2</b>   | <i>z/c</i>             | 0.25727(9)          | 0.25726(8)          | 0.25709(8)          | 0.2565(3)            | 0.2558(5)           |
|              | $U_{iso}/\text{\AA}^2$ | 0.0033(4)           | 0.0009(3)           | 0.0024(3)           | 0.0017(12)           | 0.0018(14)          |
| <b>Fe3</b>   | <i>z/c</i>             | 0.02719(5)          | 0.02721(4)          | 0.02724(4)          | 0.02730(4)           | 0.02724(5)          |
|              | $U_{iso}/\text{\AA}^2$ | 0.0028(3)           | 0.0014(2)           | 0.0034(2)           | 0.0023(2)            | 0.0010(2)           |
| <b>Fe4</b>   | <i>z/c</i>             | 0.19030(5)          | 0.19045(5)          | 0.19050(4)          | 0.19066(4)           | 0.19091(5)          |
|              | $U_{iso}/\text{\AA}^2$ | 0.0030(3)           | 0.0014(2)           | 0.0034(2)           | 0.0026(2)            | 0.0018(2)           |
| <b>Fe5</b>   | <i>x/a</i>             | 0.16878(7)          | 0.16873(5)          | 0.16878(5)          | 0.16878(5)           | 0.16871(5)          |
|              | <i>z/c</i>             | 0.89180(3)          | 0.89163(3)          | 0.89144(2)          | 0.89112(2)           | 0.89075(3)          |
|              | $U_{iso}/\text{\AA}^2$ | 0.0030(2)           | 0.00164(19)         | 0.00353(17)         | 0.0027(2)            | 0.0020(2)           |
| <b>O1</b>    | <i>z/c</i>             | 0.1506(3)           | 0.1505(2)           | 0.1506(2)           | 0.1508(2)            | 0.1514(2)           |
|              | $U_{iso}/\text{\AA}^2$ | 0.0045(9)           | 0.0026(7)           | 0.0044(7)           | 0.0022(7)            | 0.0015(7)           |
| <b>O2</b>    | <i>z/c</i>             | -0.0544(3)          | -0.0542(2)          | -0.0546(2)          | -0.0549(2)           | -0.0548(2)          |
|              | $U_{iso}/\text{\AA}^2$ | 0.0043(10)          | 0.0022(8)           | 0.0042(8)           | 0.0036(7)            | 0.0028(8)           |
| <b>O3</b>    | <i>x/a</i>             | 0.1829(6)           | 0.1827(4)           | 0.1822(4)           | 0.1824(4)            | 0.1825(4)           |
|              | $U_{iso}/\text{\AA}^2$ | 0.0074(9)           | 0.0048(7)           | 0.0074(7)           | 0.0060(7)            | 0.0066(8)           |
| <b>O4</b>    | <i>x/a</i>             | 0.1561(3)           | 0.1563(3)           | 0.1563(3)           | 0.1564(2)            | 0.1561(3)           |
|              | <i>z/c</i>             | 0.05197(16)         | 0.05217(14)         | 0.05221(13)         | 0.05227(13)          | 0.05247(16)         |
|              | $U_{iso}/\text{\AA}^2$ | 0.0041(6)           | 0.0024(5)           | 0.0046(5)           | 0.0031(4)            | 0.0024(5)           |
| <b>O5</b>    | <i>x/a</i>             | 0.5021(3)           | 0.5027(3)           | 0.5031(3)           | 0.5038(2)            | 0.5046(3)           |
|              | <i>z/c</i>             | 0.14962(16)         | 0.15003(13)         | 0.15017(12)         | 0.15064(12)          | 0.15109(15)         |
|              | $U_{iso}/\text{\AA}^2$ | 0.0037(6)           | 0.0027(5)           | 0.0051(5)           | 0.0039(4)            | 0.0037(5)           |
|              |                        |                     |                     |                     |                      |                     |
|              | <i>a/\text{\AA}</i>    | 5.8998(8)           | 5.8956(8)           | 5.8915(8)           | 5.8955(8)            | 5.8896(8)           |
|              | <i>c/\text{\AA}</i>    | 23.259(5)           | 23.224(5)           | 23.155(5)           | 23.100(5)            | 23.100(5)           |
|              | $V/\text{\AA}^3$       | 701.1(2)            | 699.08(19)          | 696.04(19)          | 695.32(19)           | 693.92(19)          |
|              |                        | -9 < <i>h</i> <+8   | -8 < <i>h</i> <+6   | -9 < <i>h</i> <+9   | -7 < <i>h</i> <+9    | -9 < <i>h</i> <+9   |
|              | <i>hkl</i> -range      | -9 < <i>k</i> <+3   | -8 < <i>k</i> <+9   | -6 < <i>k</i> <+9   | -9 < <i>k</i> <+9    | -9 < <i>k</i> <+8   |
|              |                        | -27 < <i>l</i> <+36 | -36 < <i>l</i> <+18 | -24 < <i>l</i> <+36 | -27 < <i>l</i> <+36  | -36 < <i>l</i> <+14 |
|              | $R_1$                  | 0.0628              | 0.0495              | 0.0449              | 0.0442               | 0.0544              |
|              | $wR_2$                 | 0.1426              | 0.1169              | 0.1069              | 0.1193               | 0.1297              |
|              | GooF                   | 1.336               | 1.348               | 1.340               | 1.449                | 1.229               |

\* SOFs of Ba/Sr were refined for mixed compounds; SOFs of Fe and O were fixed to 1 because their refinements led to values close to unity
